# Supplementary material for: Efficient C3N4/graphene oxide macroscopic aerogel visible-light photocatalyst
Source: Royal Society of Chemistry journal article supplement (doi:10.1039/c6ta01804a), 2016-01-01
Supplement: c6ta01804a2.pdf [file c6ta01804a2.pdf]

## **Efficient C<sub>3</sub>N<sub>4</sub>/graphene oxide aerogel macroscopic visible-light photocatalyst**

Wenchao Wan<sup>1,2</sup>, San Yu<sup>2</sup>, Fan Dong<sup>3</sup>, Qian Zhang<sup>2</sup>, and Ying Zhou<sup>1,2\*</sup>

<sup>1</sup>State Key Laboratory of Oil and Gas Reservoir Geology and Exploitation, Southwest Petroleum University, Xindu Road 8, Chengdu 610500, China

<sup>2</sup>The Center of New Energy Materials and Technology, School of Materials Science and Engineering, Southwest Petroleum University, Xindu Road 8, Chengdu 610500, China

<sup>3</sup> College of Environment and Resources, Chongqing Key Laboratory of Catalysis and Functional Organic Molecules, Chongqing Technology and Business University, Chongqing 400067, China

\*To whom correspondence should be addressed

Email: [yzhou@swpu.edu.cn](mailto:yzhou@swpu.edu.cn), [yzhou44@126.com](mailto:yzhou44@126.com) (Y. Zhou)

## Supplementary Methods

### Measurement of the specific surface area.

The specific surface area was determined through the MB adsorption method by UV-vis spectroscopy (Shimadzu UV-2600).<sup>1</sup> The SSA of the sample was calculated using the following equation:

$$SSA = \frac{N_A A_{MB} (C_0 - C_e) V}{M_{MB} m_s}$$

where  $N_A$  is Avogadro number ( $6.02 \times 10^{23} \text{ mol}^{-1}$ ),  $A_{MB}$  is the covered area of per  $M_B$  molecule (typically assumed to be  $1.35 \text{ nm}^2$ ),  $C_0$  and  $C_e$  are the initial and equilibrium concentrations of MB, respectively,  $V$  is the volume of MB solution,  $M_{MB}$  is the relative molecular mass of  $M_B$ , and  $m_s$  is the mass of the sample.

## Supplementary Figures

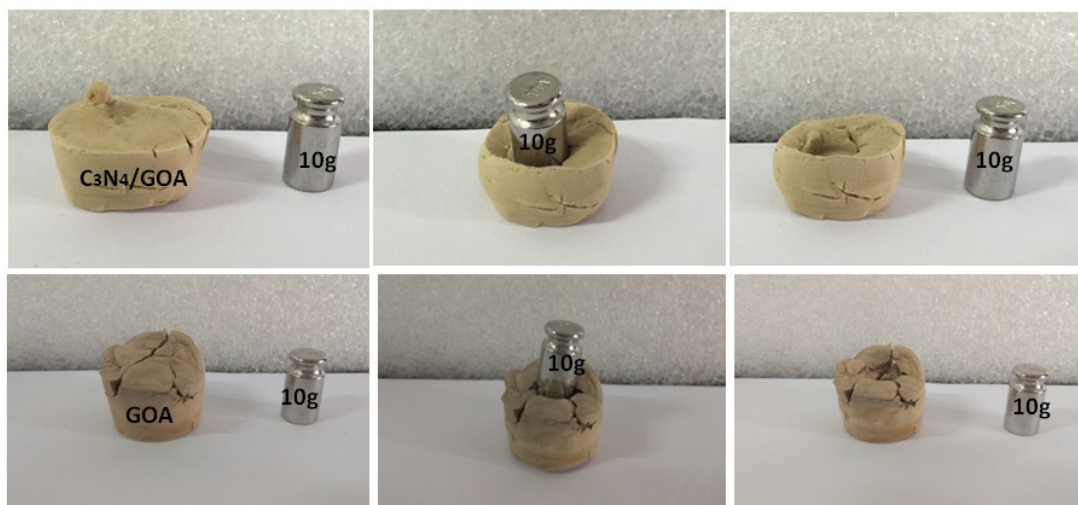

**Figure S1.** The mechanical property of the monolithic C<sub>3</sub>N<sub>4</sub>/GOA and GOA.

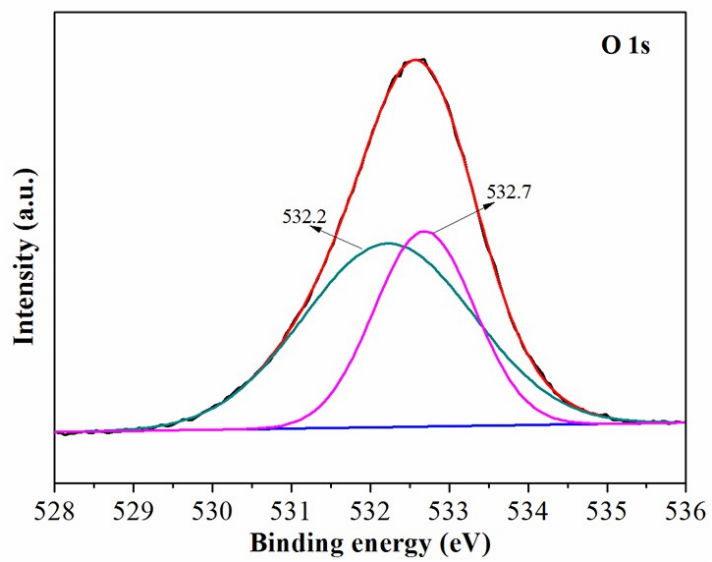

**Figure S2.** The O1s XPS peak of C<sub>3</sub>N<sub>4</sub>/GOA.

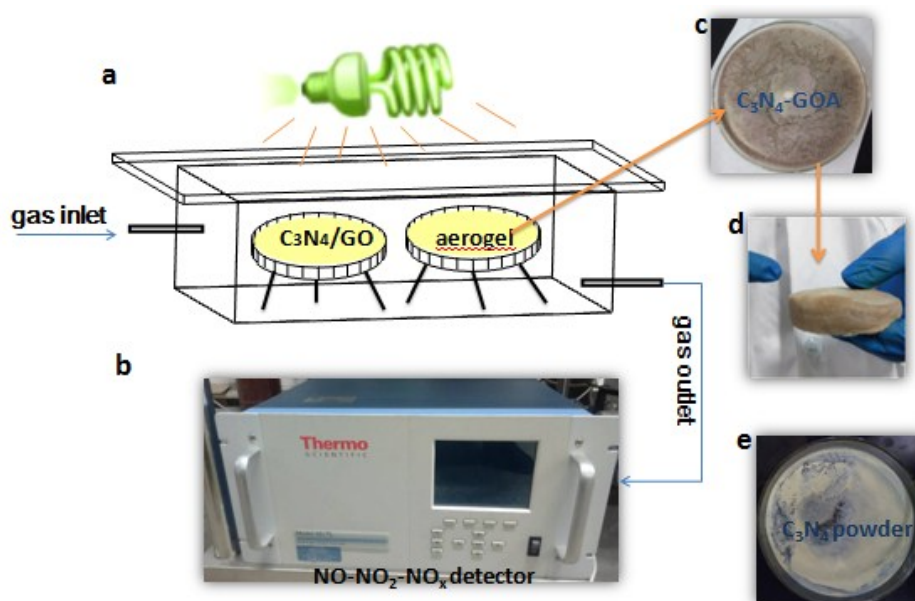

**Figure S3.** The schematic of NO removal device: (a) the reactor, (b) the NO detector, (c) The  $C_3N_4$ /GOA sample in the petri dish for experiment, (d) the sample being taken up and (e) the powdery  $C_3N_4$  in the petri dish.

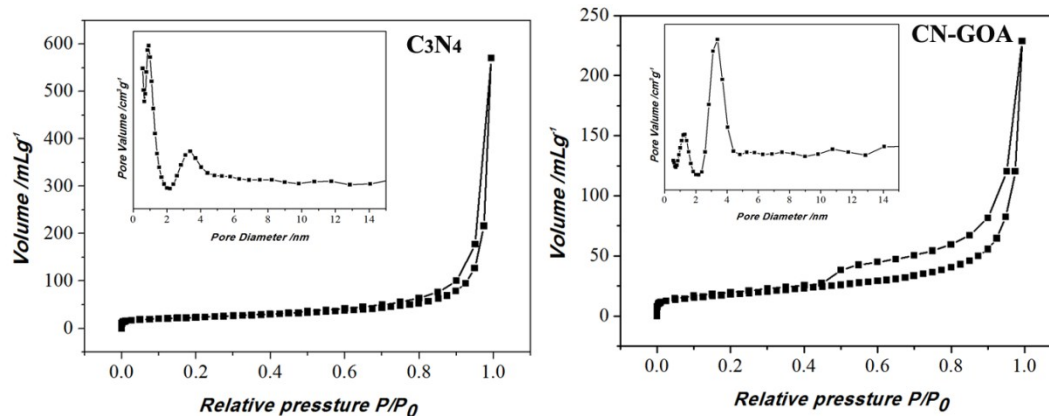

**Figure S4.** Nitrogen adsorption/desorption isotherm of the powdery  $C_3N_4$  and  $C_3N_4$ /GOA with 90wt% of  $C_3N_4$  (inset: pore volume of the corresponding samples).

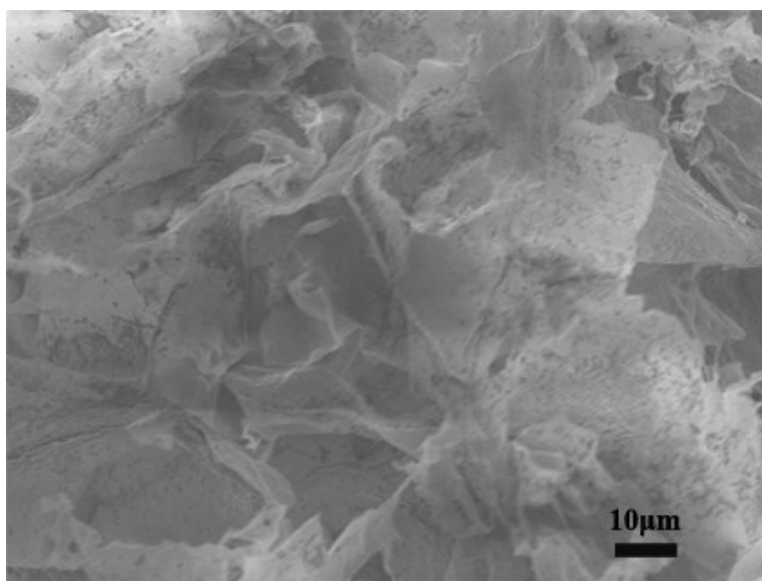

**Figure S5.** SEM image of C<sub>3</sub>N<sub>4</sub>/GOA after photocatalytic oxidation of NO

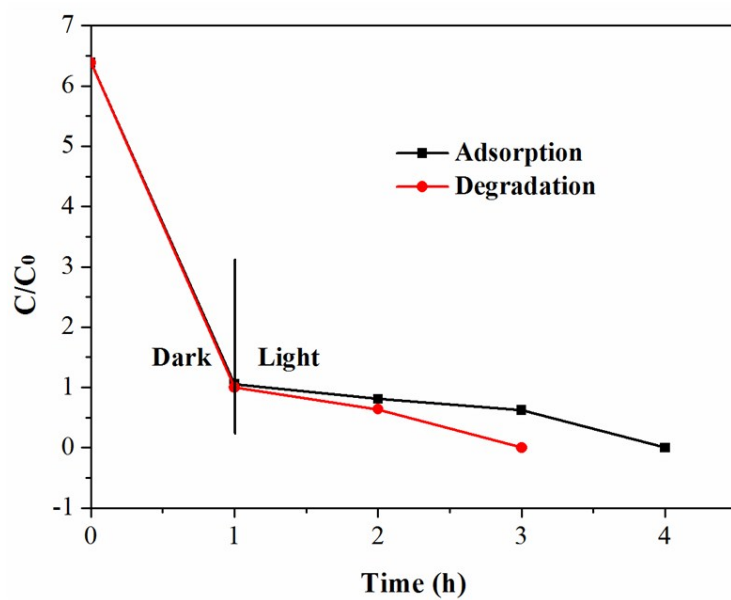

**Figure S6.** The adsorption and photodegradation for RhB over C<sub>3</sub>N<sub>4</sub>/GOA under visible light irradiation

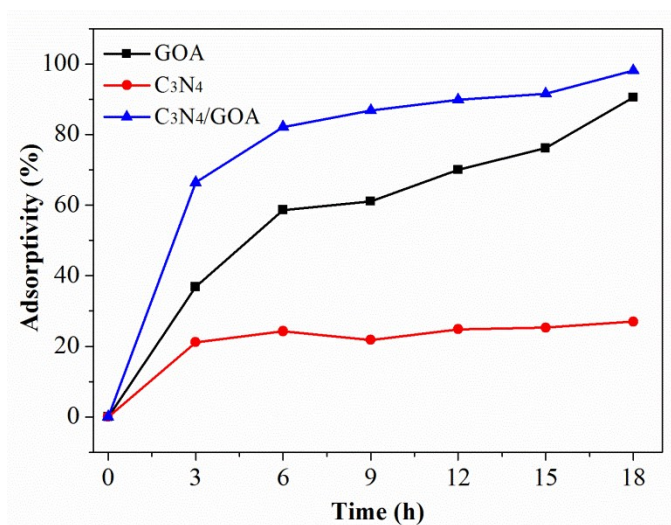

**Figure S7.** The adsorption for methylene blue (MB) over GO, C<sub>3</sub>N<sub>4</sub>/GOA and powdery C<sub>3</sub>N<sub>4</sub>.

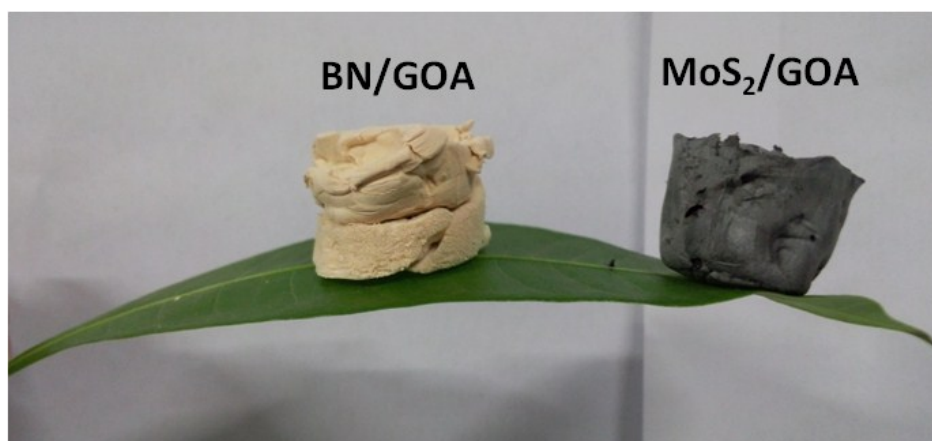

**Figure S8.** Photographs of BN/GOA and MoS<sub>2</sub>/GOA.

## Supplementary Tables

**Table S1.** The modeling of *R-C* values of C<sub>3</sub>N<sub>4</sub> and C<sub>3</sub>N<sub>4</sub>/GOA

|                                                | C <sub>3</sub> N <sub>4</sub> -dark | C <sub>3</sub> N <sub>4</sub> -light | C <sub>3</sub> N <sub>4</sub> /GOA-dark | C <sub>3</sub> N <sub>4</sub> /GOA-light |
|------------------------------------------------|-------------------------------------|--------------------------------------|-----------------------------------------|------------------------------------------|
| R <sub>o</sub> (Ω cm <sup>2</sup> )            | 4.031                               | 4.248                                | 3                                       | 3.084                                    |
| Co (F cm <sup>-2</sup> )                       | 8.2767E-08                          | 8.0658E-08                           | 2.1169E-07                              | 1.7985E-07                               |
| W <sub>o</sub> -P                              | 0.23616                             | 0.29589                              | 0.39644                                 | 0.32383                                  |
| R <sub>s</sub> (Ω cm <sup>2</sup> )            | 16.13                               | 16.07                                | 17                                      | 16.72                                    |
| R <sub>1</sub> (Ω cm <sup>2</sup> )            | 2015                                | 1524                                 | 27.3                                    | 21.72                                    |
| CPE1-P                                         | 0.92892                             | 0.94455                              | 0.48976                                 | 0.50376                                  |
| CPE1-T (S<br>cm <sup>-2</sup> S <sup>p</sup> ) | 0.00030993                          | 0.00075723                           | 0.0057034                               | 0.0060799                                |
| R <sub>2</sub> (Ω cm <sup>2</sup> )            | 4834                                | 806.4                                | 924.8                                   | 514.8                                    |
| C <sub>2</sub> (F cm <sup>-2</sup> )           | 0.00018709                          | 0.00096299                           | 0.012702                                | 0.011492                                 |

**R<sub>o</sub>**: the resistance of Pt electrode;

**R<sub>1</sub>**: the resistance of work electrode, CPE1-P and CPE1-T: the deviation of constant phase angle;

**R<sub>s</sub>**: the resistance of the solution;

**R<sub>2</sub>**: the resistance of the reaction;

## Supplementary References

1. Yang, C., Shen, J., Wang, C., Fei, H., Bao, H., Wang, G. *J. Mater. Chem. A* **2**, 1458 (2014).
